# Supplementary material for: Emergency department crowding: A systematic review of causes, consequences and solutions
Source: PubMed Central journal article supplement (PMC6117060; doi:10.1371/journal.pone.0203316), 2018-08-30
Supplement: pone.0203316.s002.pdf [file pone.0203316.s002.pdf]

## S1 Details of search strategy

The following search strategy is an example of the strategy used on all databases. The search terms were selected based on commonly cited keywords in the literature around emergency department crowding.

### Medline using Ovid (Jan 2000 to June 2018)

1. Accident and emergency “OR” ED “OR” Emergency Department “OR” Emergency service
2. Crowding “OR” Overcrowding “OR” Congestion “OR” Utilisation
3. #1 “AND” #2
4. Consequences “OR” Outcomes “OR” Harm “OR” Mortality “OR” Negative impact
5. Cause
6. Solution “OR” Strategies “OR” Intervention
7. #3 “AND” #4
8. #3 “AND” #5
9. #3 “AND” #6

**LIMITS:** English language AND peer-reviewed journal article AND Jan 1<sup>st</sup> 2000-Current

**Table 1** Databases searched with dates of search and results.

| Database           | Date search                | Results |
|--------------------|----------------------------|---------|
| Medline using Ovid | June 13 <sup>th</sup> 2018 | 1019    |
| Web of science     | June 13 <sup>th</sup> 2018 | 1289    |
| Embase             | June 13 <sup>th</sup> 2018 | 1393    |
| CINAHL             | June 13 <sup>th</sup> 2018 | 2065    |
